# Supplementary material
Source: Springer Nature journal article supplement (https://www.springermedizin.de/resource/supplementary/12894_2006_92_MOESM7_ESM.pdf/9513940)

5D3 raw >50

Endothelial raw >50

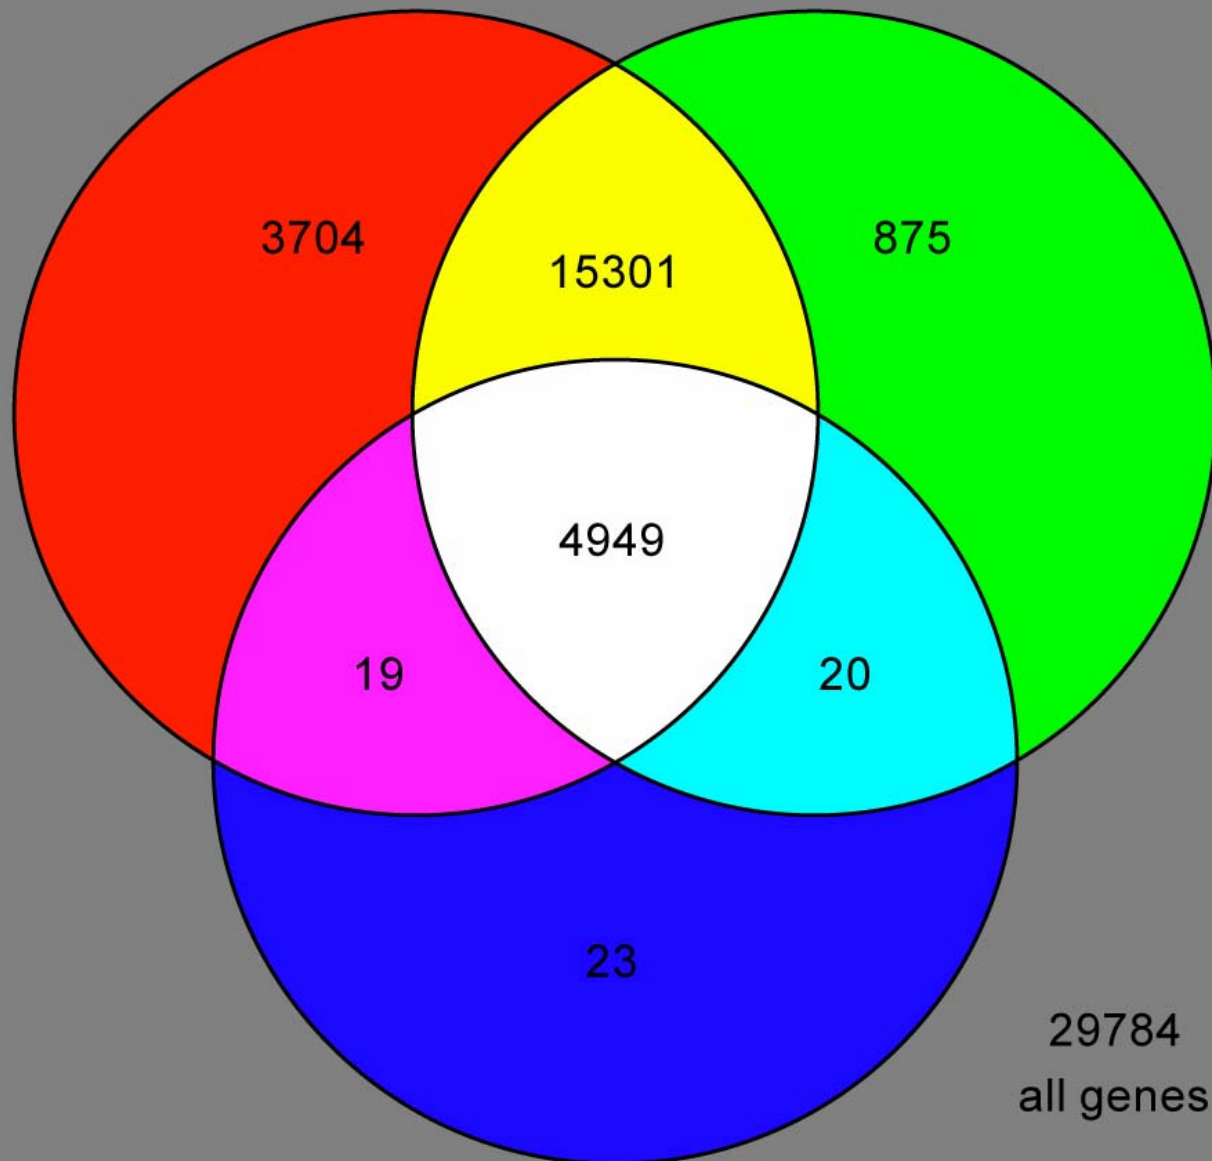

SP raw >50

29784  
all genes

Supplement: MOESM7 [file 9513940]
